# Supplementary material for: Immunoregulatory mechanisms in Chagas disease: modulation of apoptosis in T-cell mediated immune responses
Source: Springer Nature journal article supplement (doi:10.1186/s12879-016-1523-1), 2016-04-30
Supplement: MOESM1 [file 10110788]

Supplemental Figure 1

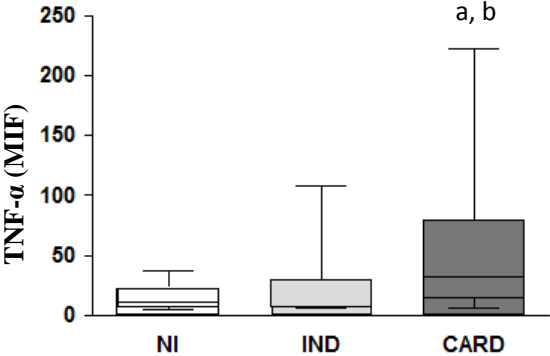

A

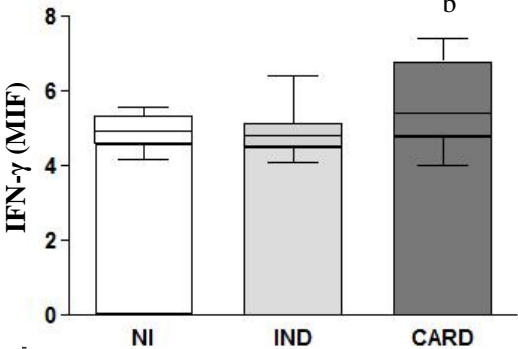

C

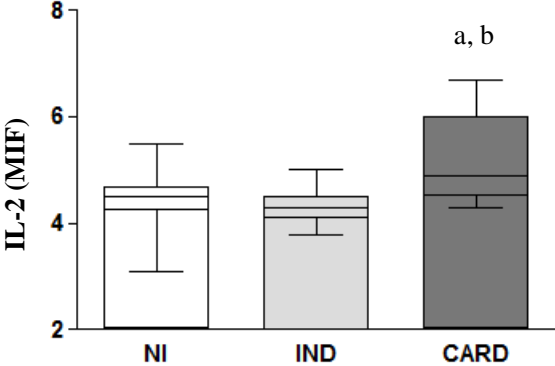

B

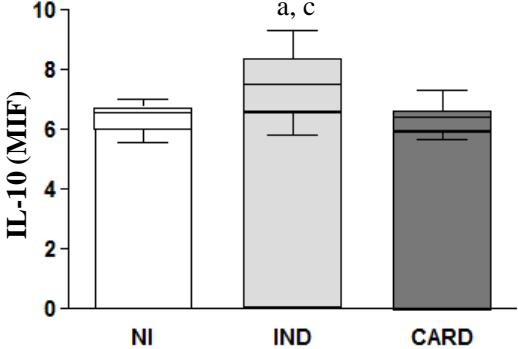

D
